# Supplementary material for: Genome-Wide Association Study of Fluorescent Oxidation Products Accounting for Tobacco Smoking Status in Adults from the French EGEA Study
Source: MDPI journal article supplement (doi:10.3390/antiox11050802), 2022-04-20
Supplement: s1 [file s1]

## **ONLINE SUPPLEMENTARY MATERIALS**

### **Genome-wide association study of Fluorescent Oxidation Products accounting for tobacco smoking status in adults from the French EGEA study**

Laurent Orsi, PhD <sup>1</sup>; Patricia Margaritte-Jeannin, PhD <sup>2,‡</sup>; Miora Andrianjafimasy, PhD <sup>1,‡</sup>,  
Orianne Dumas, PhD <sup>1</sup>; Hamida Mohamdi, MSc <sup>2</sup>; Emmanuelle Bouzigon, MD, PhD <sup>2</sup>;  
Florence Demenais, MD <sup>2</sup>; Régis Matran, MD, PhD <sup>3,4,5</sup>; Farid Zerimech, MD, PhD <sup>3,4,5</sup>; Rachel  
Nadif, PhD <sup>1,\$</sup>; Marie-Hélène Dizier, PhD <sup>2,\$</sup>

#### **Author Affiliations**

<sup>1</sup> Université Paris-Saclay, UVSQ, Univ. Paris-Sud, INSERM, équipe d'Epidémiologie  
Respiratoire Intégrative, CESP, F-94807 Villejuif, France;

<sup>2</sup> Université Paris Cité, INSERM, UMR 1124, Group of Genomic Epidemiology and  
Multifactorial Diseases, F-75006 Paris, France

<sup>3</sup> Univ. Lille, ULR 4483 – IMPECS, F-59000 Lille, France

<sup>4</sup> CHU Lille, F-59000 Lille, France

<sup>5</sup> Institut Pasteur de Lille, F-59000 Lille, France

‡ These authors contributed equally to the work

\$ Co-last authors

**Supplement to “2.1. Study population (EGEA study)” section under MATERIALS AND METHODS. Description of the EGEA study**

**Figure S1. Flow chart of the studied population.**

**Figure S2. Manhattan plot of GWAS results of FLOPs levels (A) in the whole sample (n=1,216), (B) in never-smokers (n=604) and (C) in current smokers (n=275).**

X-axis shows chromosome position and Y-axis shows  $-\log_{10}$  P-values. The horizontal lines are drawn at  $P = 1.3 \times 10^{-7}$  for genome-wide significant threshold.

**Figure S3. Quantile-quantile (QQ) plot of GWAS results of FLOPs levels (A) in the whole sample (n=1,216), (B) in never-smokers (n=604) and (C) in current smokers (n=275).**

Y-axis shows the  $-\log_{10}$  of observed P-values. X-axis shows the  $-\log_{10}$  of expected P-values.

**Figure S4. Regional plot of association results using imputed genetic data for the three top-SNPs in the whole sample (n=1,216), region around rs270404 (A), region around rs13223298 (B) and region around rs491274 (C).**

The left Y-axis shows the  $-\log_{10}$  P-values. The position of the SNPs in megabases (GRCh 37.p13) is shown on the X-axis. Rs270404, rs13223298 and rs491274 are coloured in purple. The degree of LD (from the hg19/1000 Genomes reference panel) between all SNPs and the reference SNP (coloured in purple) we selected in the same region is reflected by the colour of the dots (red being the highest degree of LD).

**Figure S5. Regional plot of association results using imputed genetic data for the three top-SNPs in never-smokers (n=604), region around rs17823624 (A), region around rs6606856 (B) and region around rs2962642 (C).**

The left Y-axis shows the  $-\log_{10}$  P-values. The position of the SNPs in megabases (GRCh 37.p13) is shown on the X-axis. Rs17823624, rs6606856 and rs2962642 are coloured in purple. The degree of LD (from the hg19/1000 Genomes reference panel) between all SNPs and the reference SNP (coloured in purple) we selected in the same region is reflected by the colour of the dots (red being the highest degree of LD).

**Figure S6. Regional plot of association results using imputed genetic data for the three top-SNPs in current smokers (n=275), region around rs3851212 (A), region around rs1793958 (B) and region around rs17174795 (C).**

The left Y-axis shows the  $-\log_{10}$  P-values. The position of the SNPs in megabases (GRCh 37.p13) is shown on the X-axis. Rs3851212, rs1793958, rs6606856 and rs17174795 are coloured in purple. The degree of LD (from the hg19/1000 Genomes reference panel) between all SNPs and the reference SNP (coloured in purple) we selected in the same region is reflected by the colour of the dots (red being the highest degree of LD).

**Table S1. Association between FLOPs level and characteristics of the studied population (n=1,216).**

**Table S2. Three top SNPs in the whole sample: Consistency of the results in two independent sub-samples.**

**Table S3. Three top SNPs in never-smokers and in current smokers: consistency of the results in two independent sub-samples.**

**Table S4. Results from eQTL browser Phenoscanner v2.**

**Table S5. meQTLs for the three top-SNPs identified in GWAS in the whole sample, in never-smokers and in current smokers.**

**Table S6. Regulatory elements for the three top-SNPs (and proxies with  $r^2 > 0.80$ ) identified in GWAS in the whole sample, in never-smokers and in current smokers.**

## Supplement to “2.1. Study population (EGEA study)” section under MATERIALS AND METHODS

### Description of the EGEA study

The EGEA study is a cohort based on an initial group of asthma cases recruited in chest clinics from Grenoble, Lyon, Marseille, Montpellier and Paris, along with their first-degree relatives, and a group of controls (1991-1995, EGEA1, <https://egeanet.vjf.inserm.fr/index.php/en/>). The protocol and descriptive characteristics have been described previously [1,2]. Briefly, the asthma cases and their first-degree relatives were recruited from respiratory or allergic clinics. The adult cases were recruited in the five cities and children cases were recruited in Paris, Grenoble and Marseille. Control adults were recruited from electoral rolls in Paris, Lyon, Montpellier and Grenoble, a check-up centre in Marseille and surgery clinic from the same hospital in Paris and Grenoble. Control children were always recruited from surgery clinics. An overall matching by month of exam, age decade, sex and centre was done. A 12-year follow-up of the initial cohort was conducted between 2003 and 2007 (EGEA2). Among the alive cohort (n=2002), 92% (n=1845) completed a short self-administered questionnaire, and among them 1602 (n=1571 adults aged  $\geq 16$  years) had a complete examination including lung function tests, skin prick test to 12 aeroallergens, and blood samples. Inclusion criteria were based on standardized procedures (including four questions from validated and standardized British Medical Research Council/European Coal and Steel Community, American Thoracic Society, and European Community Respiratory Health Survey (ECRHS) questionnaires: ‘Have you ever had attacks of breathlessness at rest with wheezing?’, ‘Have you ever had asthma attacks?’; If yes: ‘Was this diagnosis confirmed by a physician?’ and ‘Have you had an asthma attack in the last 12

*months?'*) to diagnose asthma and to determine respiratory and allergic symptoms, treatments, environmental exposures, and lifestyle characteristics.

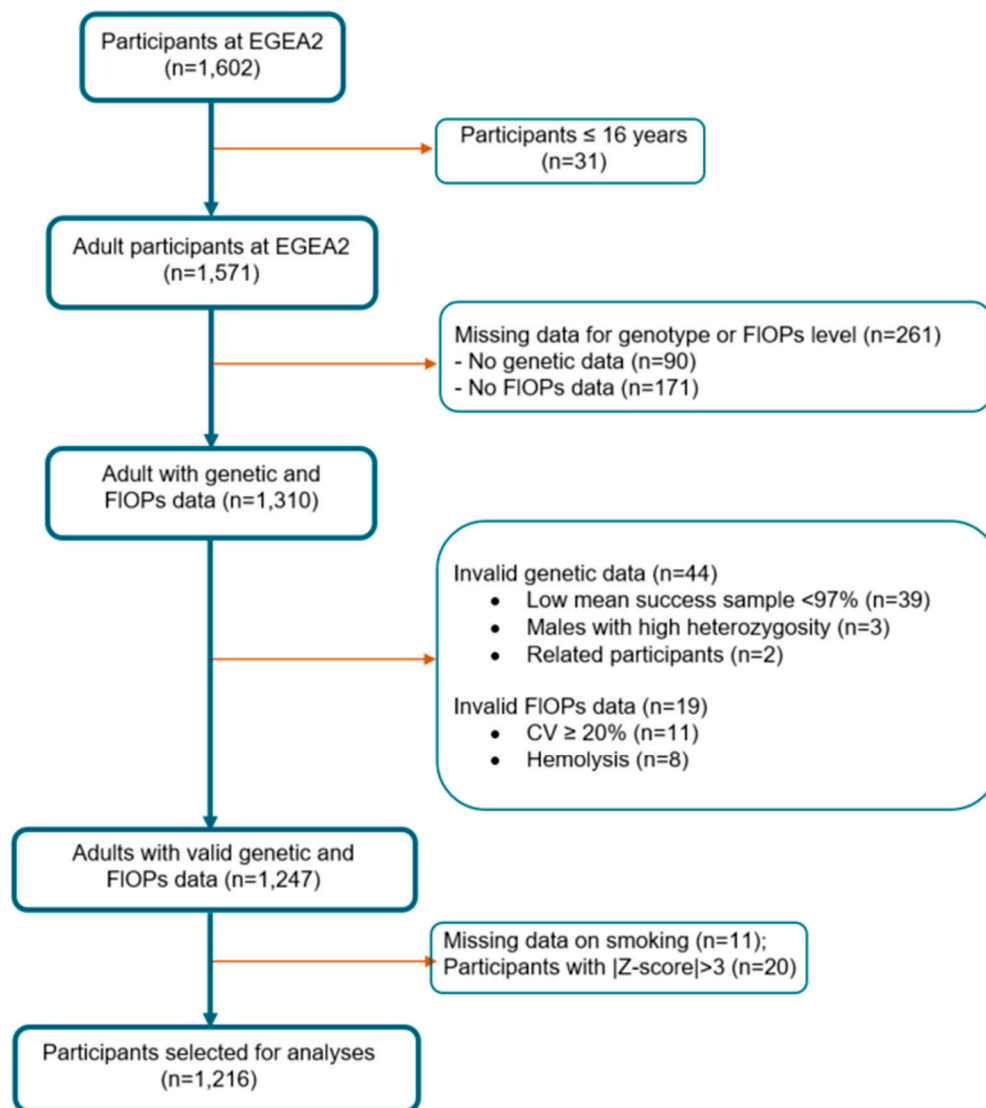

**Figure S1. Flow chart of the studied population**

**A**

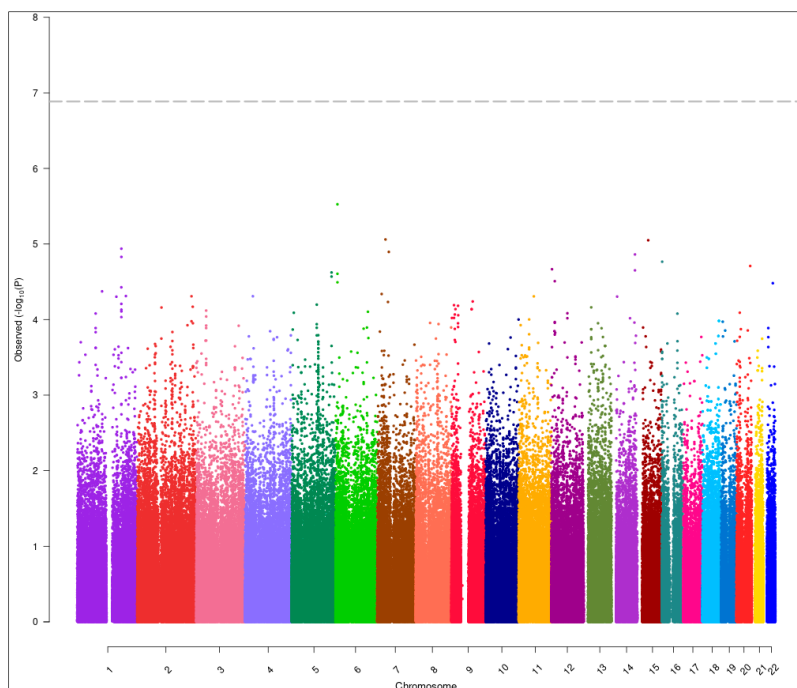

**B**

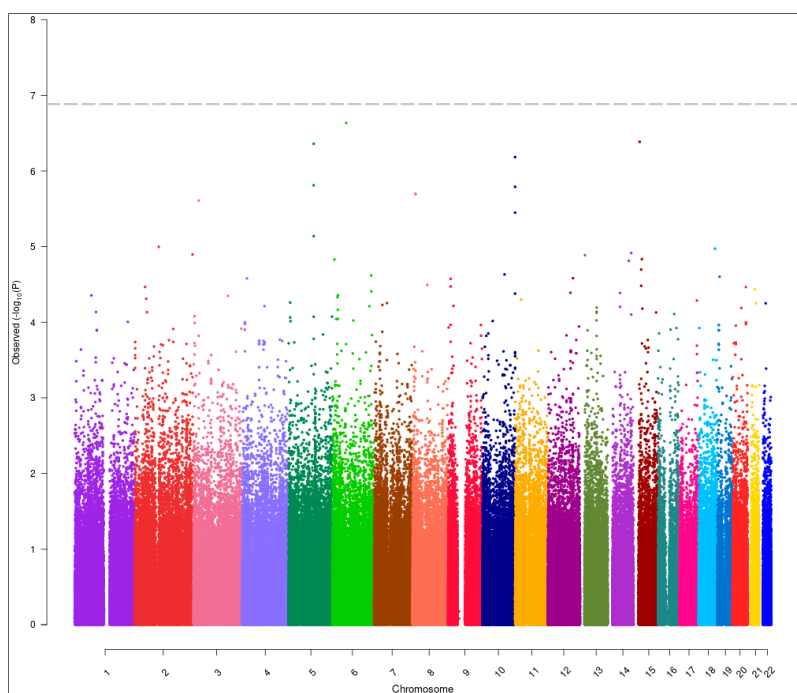

C

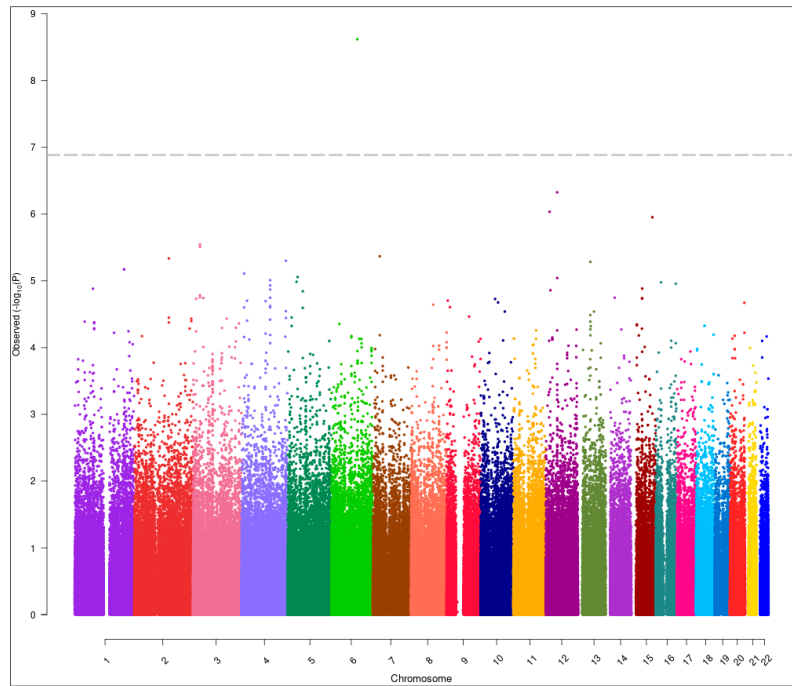

**Figure S2. Manhattan plot of GWAS results of FLOPs levels (A) in the whole sample (n=1,216), (B) in never-smokers (n=604) and (C) in current smokers (n=275).**

X-axis shows chromosome position and Y-axis shows  $-\log_{10}(P\text{-value})$ . The horizontal lines are drawn at  $P = 1.3 \times 10^{-7}$  for genome-wide significant threshold.



**A**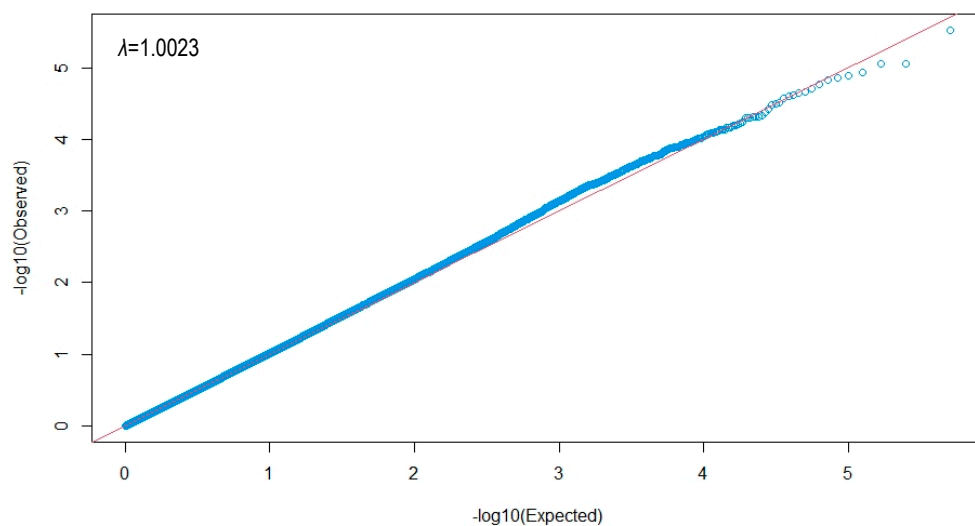**B**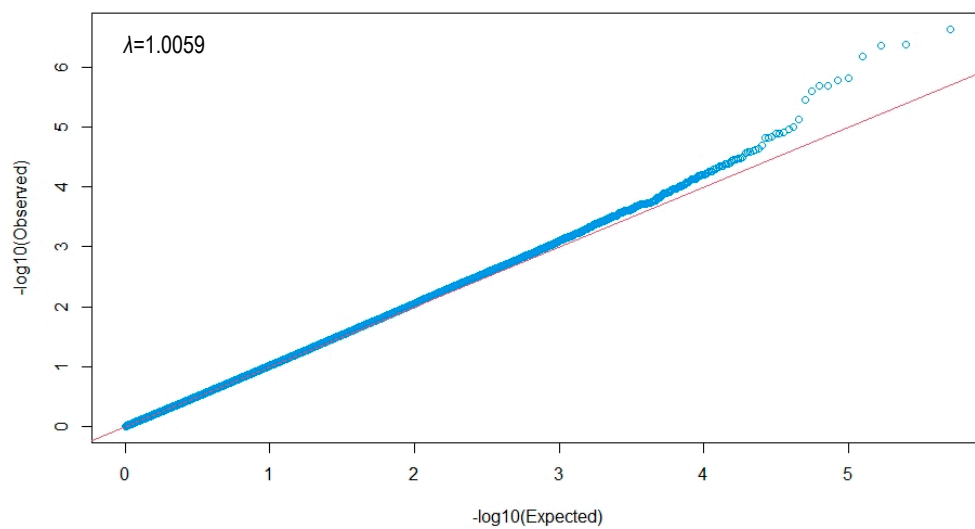**C**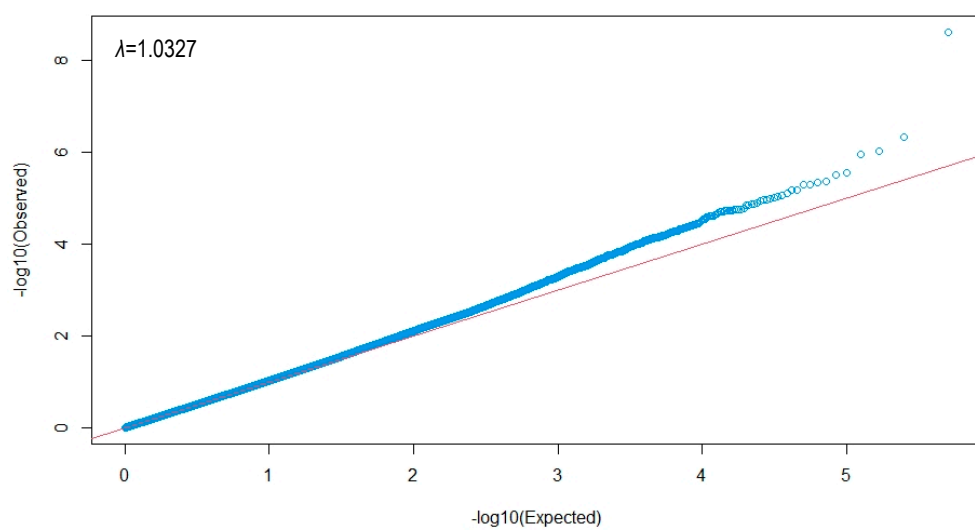

**Figure S3. Quantile-quantile (QQ) plot of GWAS results of FLOPs levels (A) in the whole sample (n=1,216), (B) in never-smokers (n=604) and (C) in current smokers (n=275).**

Y-axis shows the -log<sub>10</sub> of observed P-values. X-axis shows the -log<sub>10</sub> of expected P-values.

A

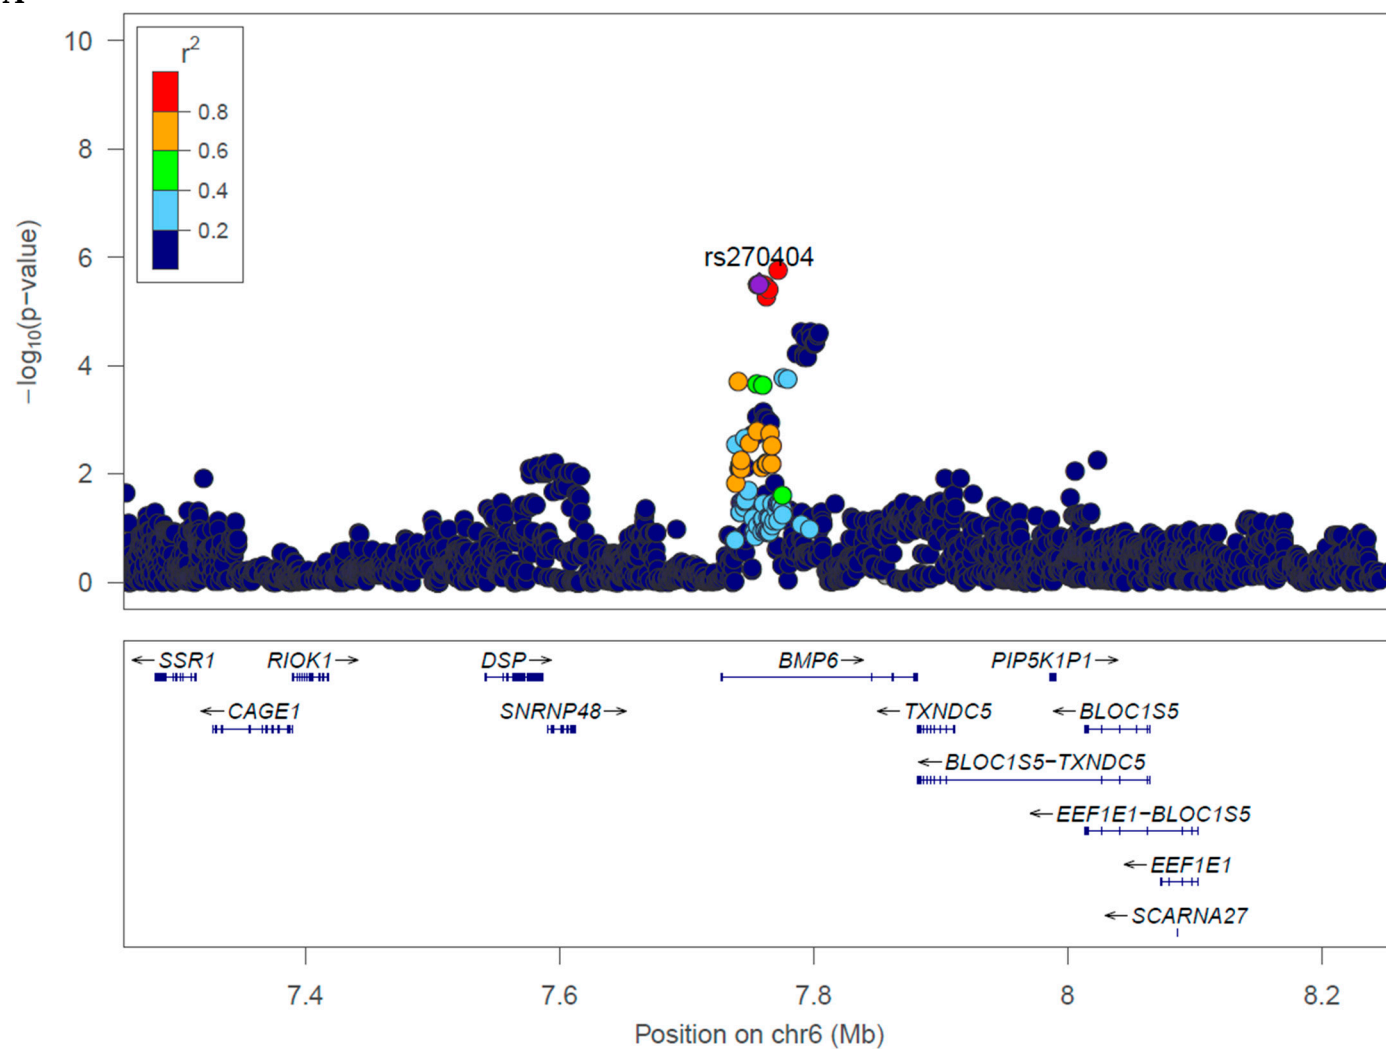

**B**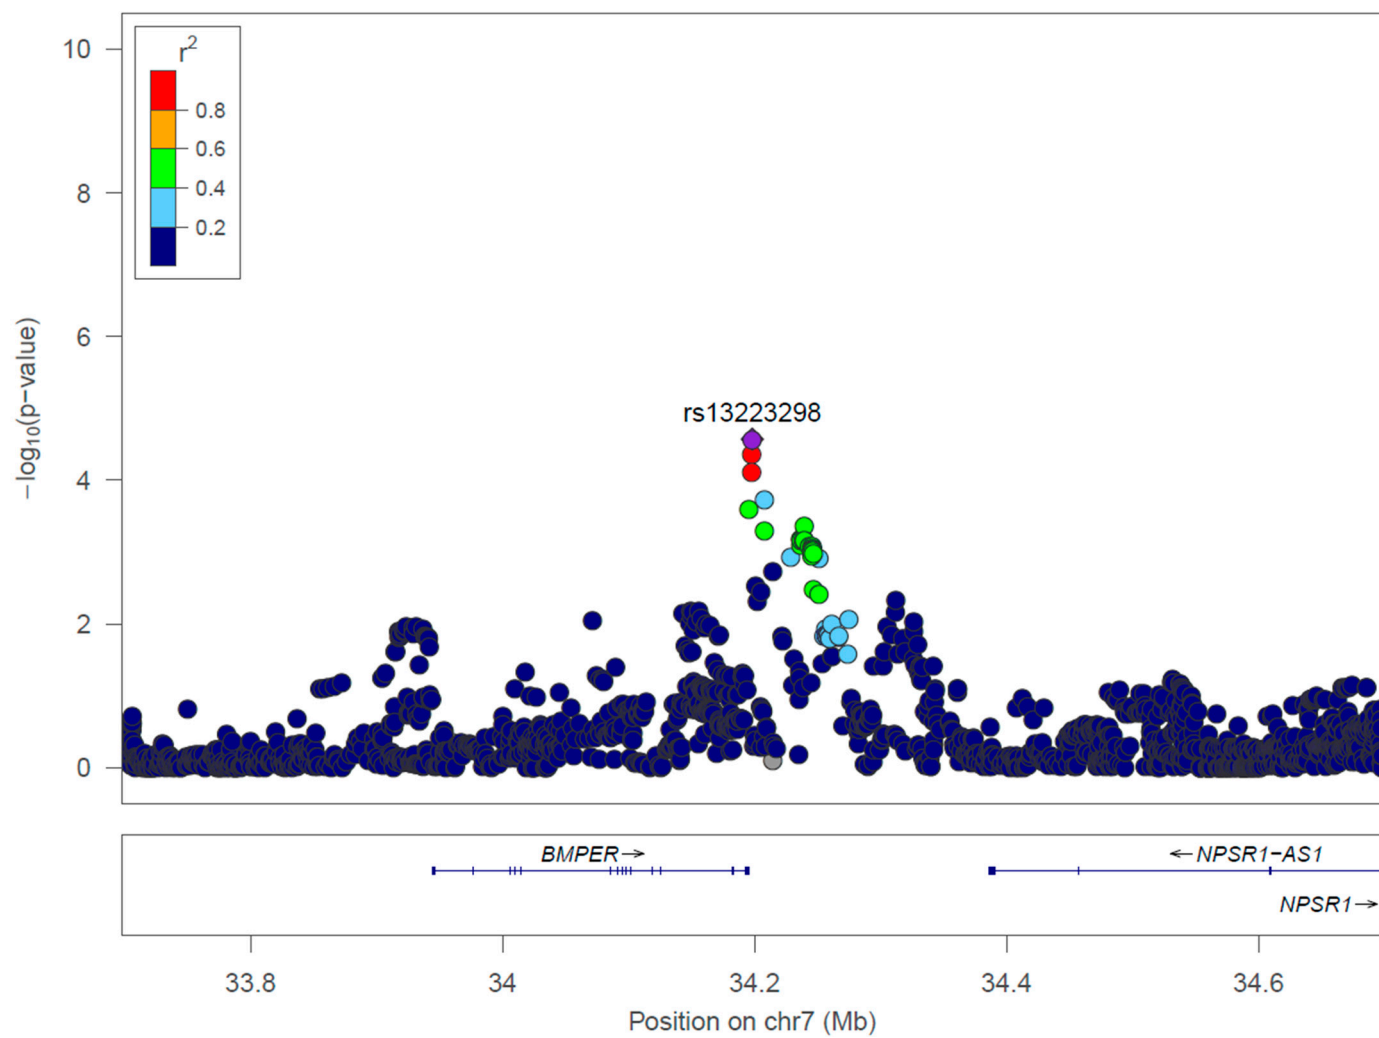

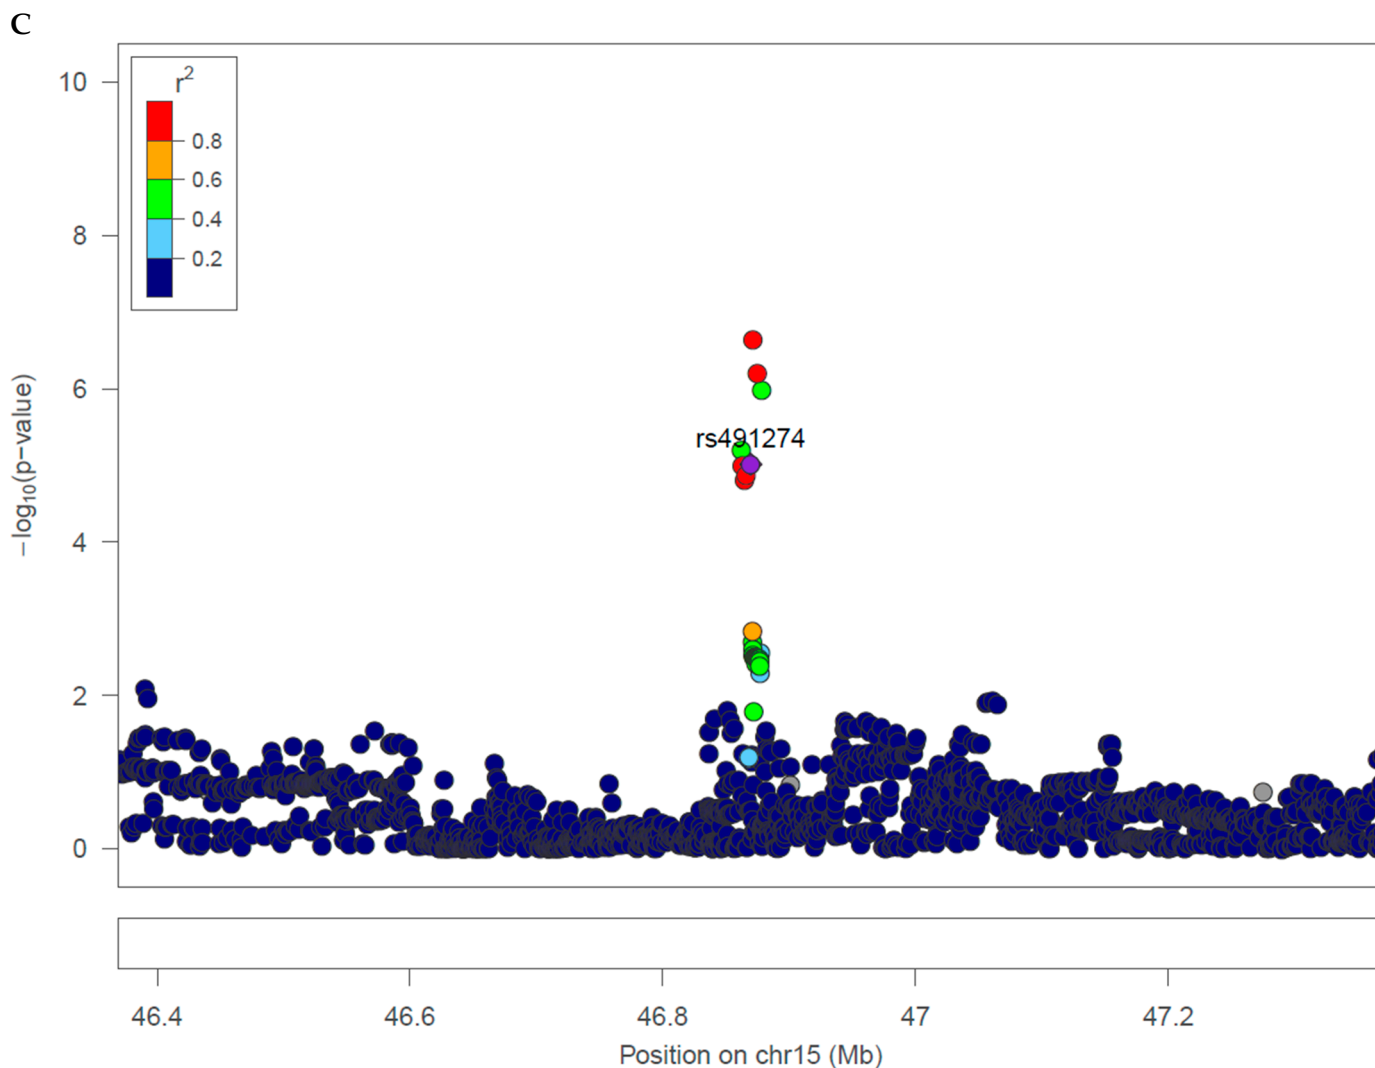

**Figure S4. Regional plot of association results using imputed genetic data for the three top-SNPs in the whole sample (n=1,216), region around rs270404 (A), region around rs13223298 (B) and region around rs491274 (C).**

The left Y-axis shows the  $-\log_{10}$  P-values. The position of the SNPs in megabases (GRCh 37.p13) is shown on the X-axis.

Rs270404, rs13223298 and rs491274 are coloured in purple. The degree of LD (from the hg19/1000 Genomes reference panel) between all SNPs and the reference SNP (coloured in purple) we selected in the same region is reflected by the colour of the dots (red being the highest degree of LD).

A

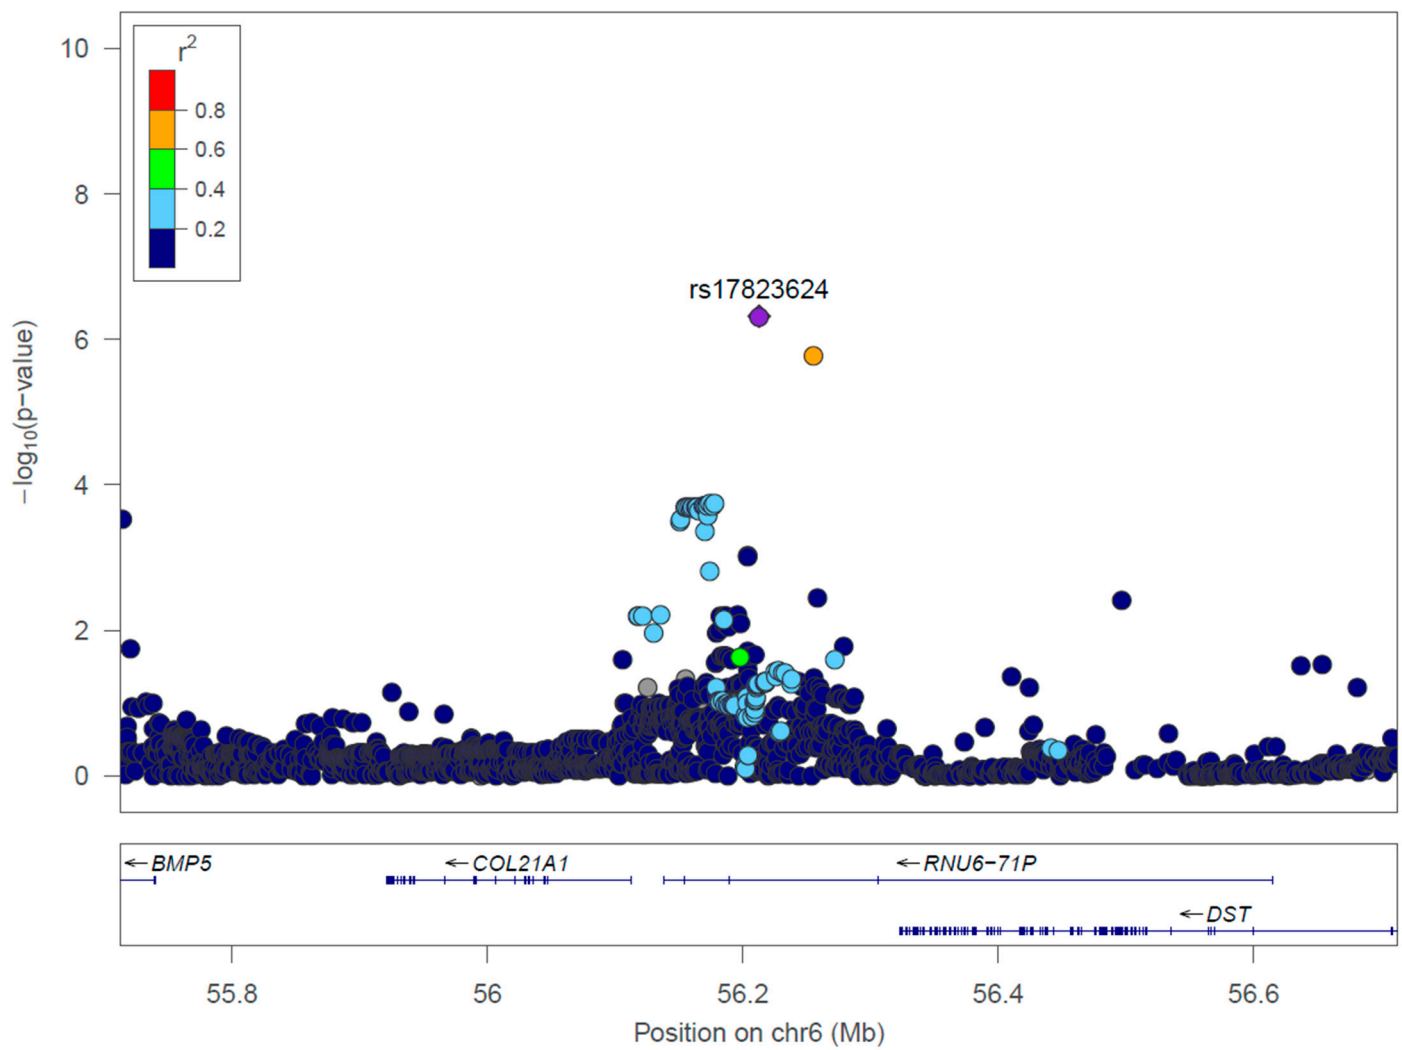

**B**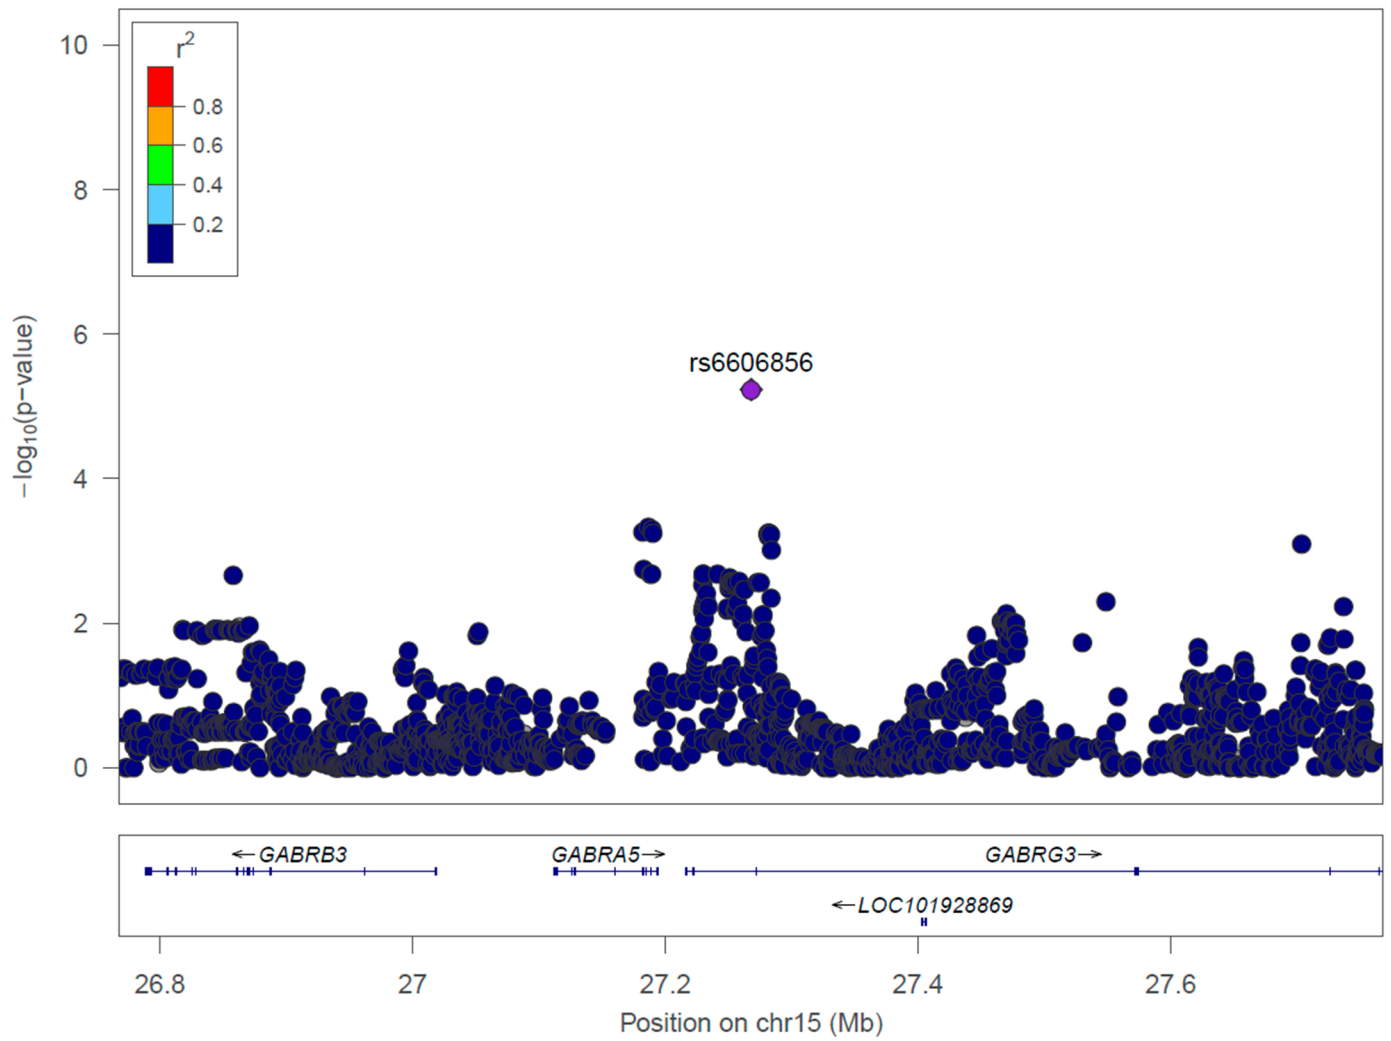

C

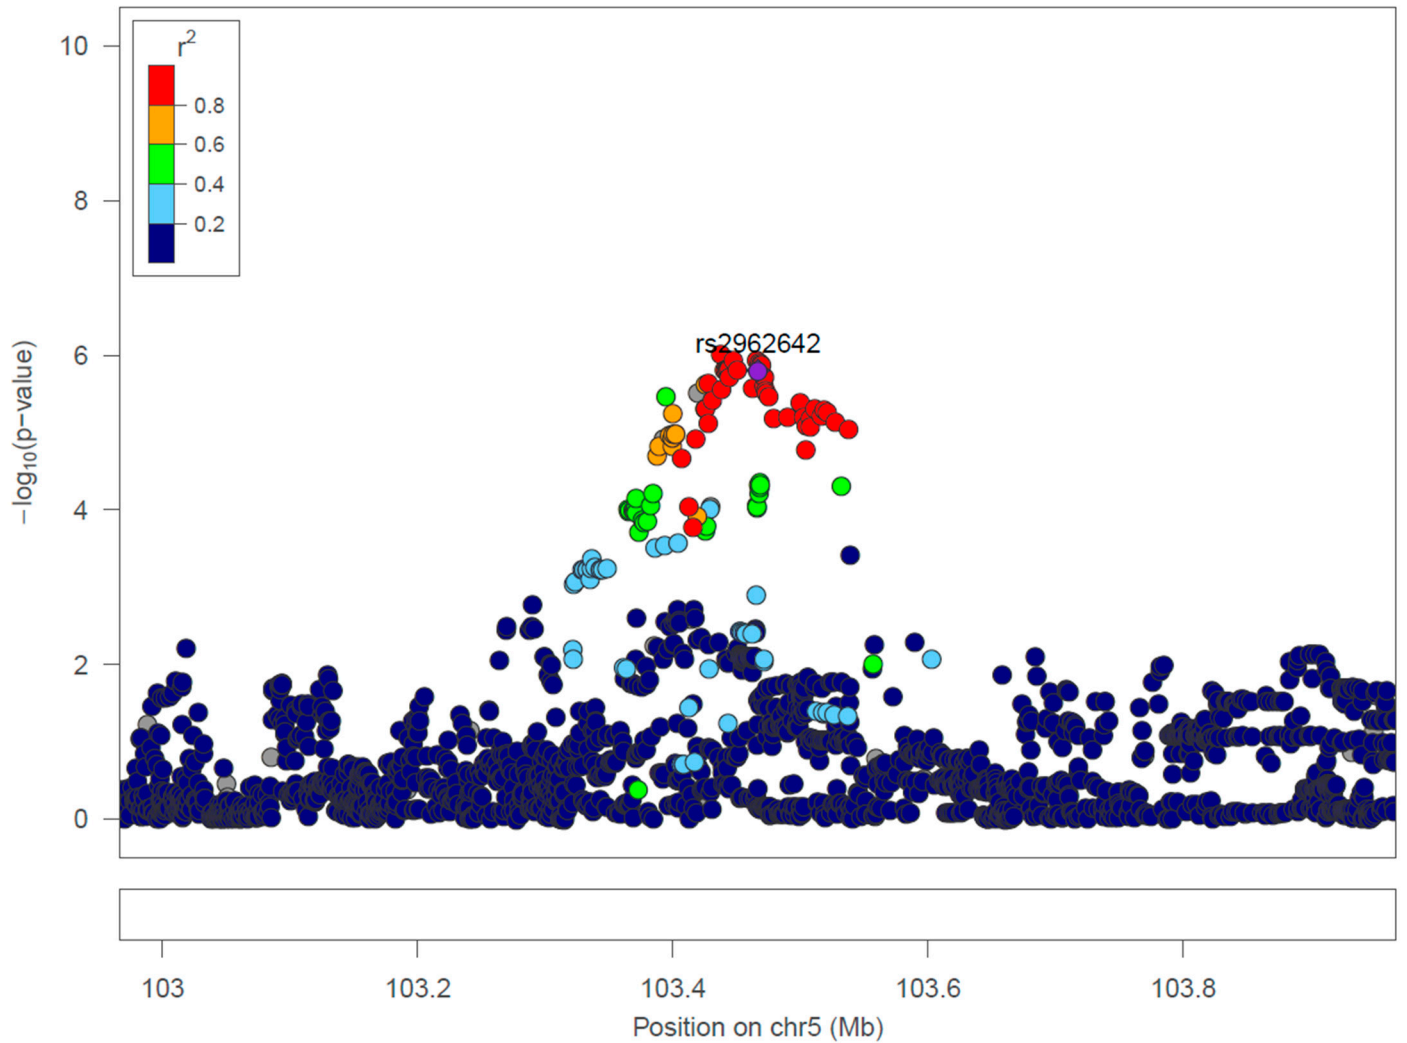

**Figure S5. Regional plot of association results using imputed genetic data for the three top-SNPs in never-smokers (n=604), region around rs17823624 (A), region around rs6606856 (B) and region around rs2962642 (C).**

The left Y-axis shows the  $-\log_{10}$  P-values. The position of the SNPs in megabases (GRCh 37.p13) is shown on the X-axis.

Rs17823624, rs6606856 and rs2962642 are coloured in purple. The degree of LD (from the hg19/1000 Genomes reference panel) between all SNPs and the reference SNP (coloured in purple) we selected in the same region is reflected by the colour of the dots (red being the highest degree of LD).

A

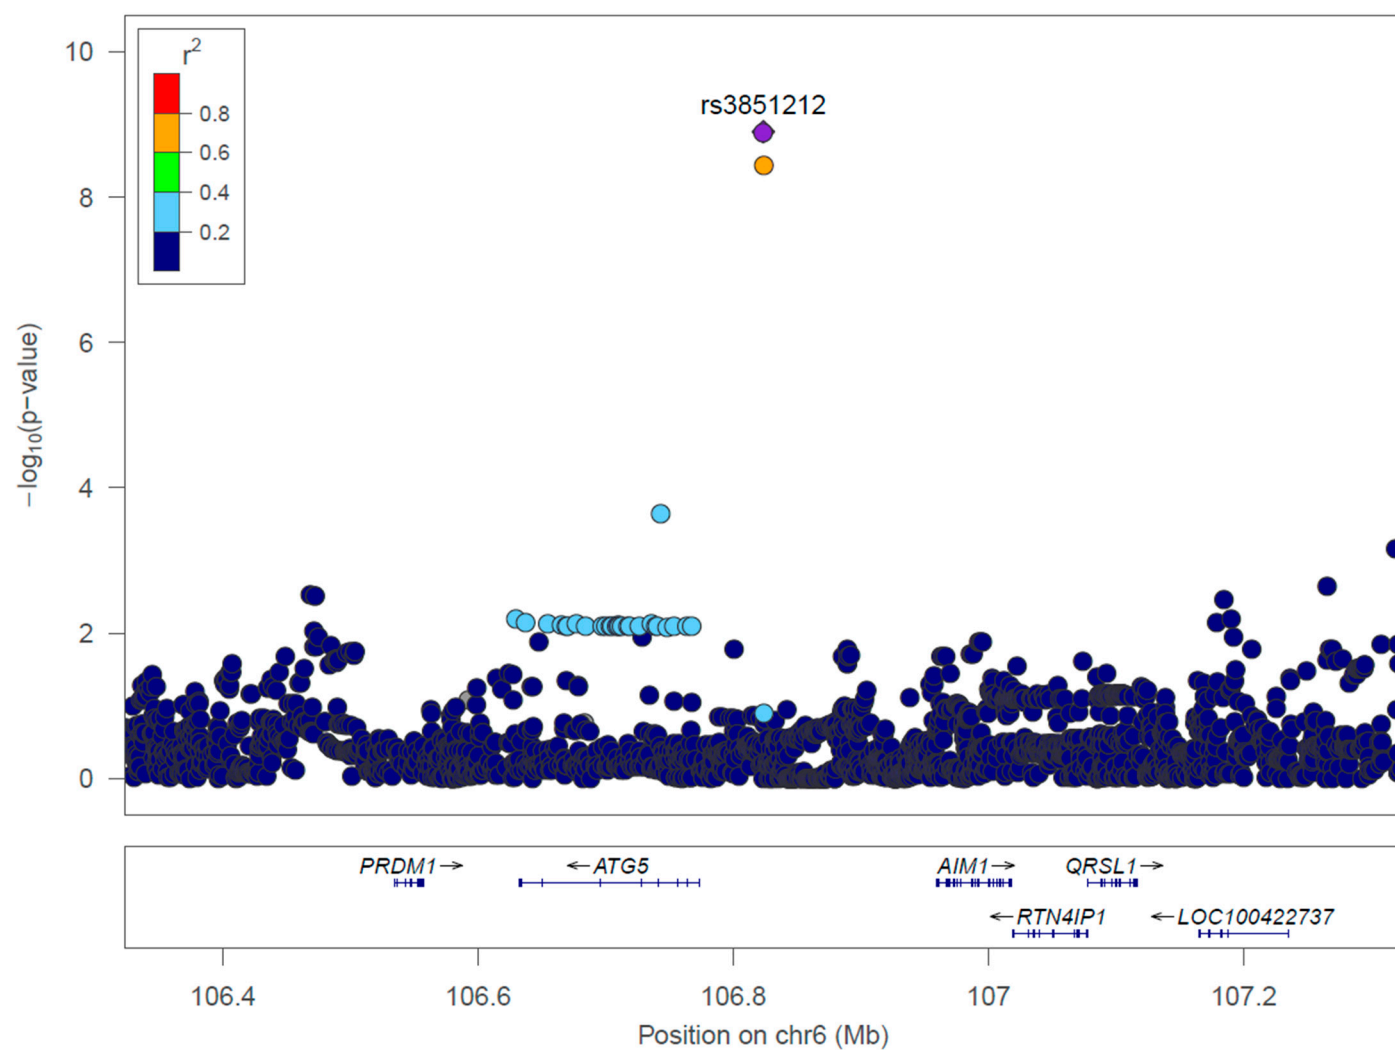



**B**

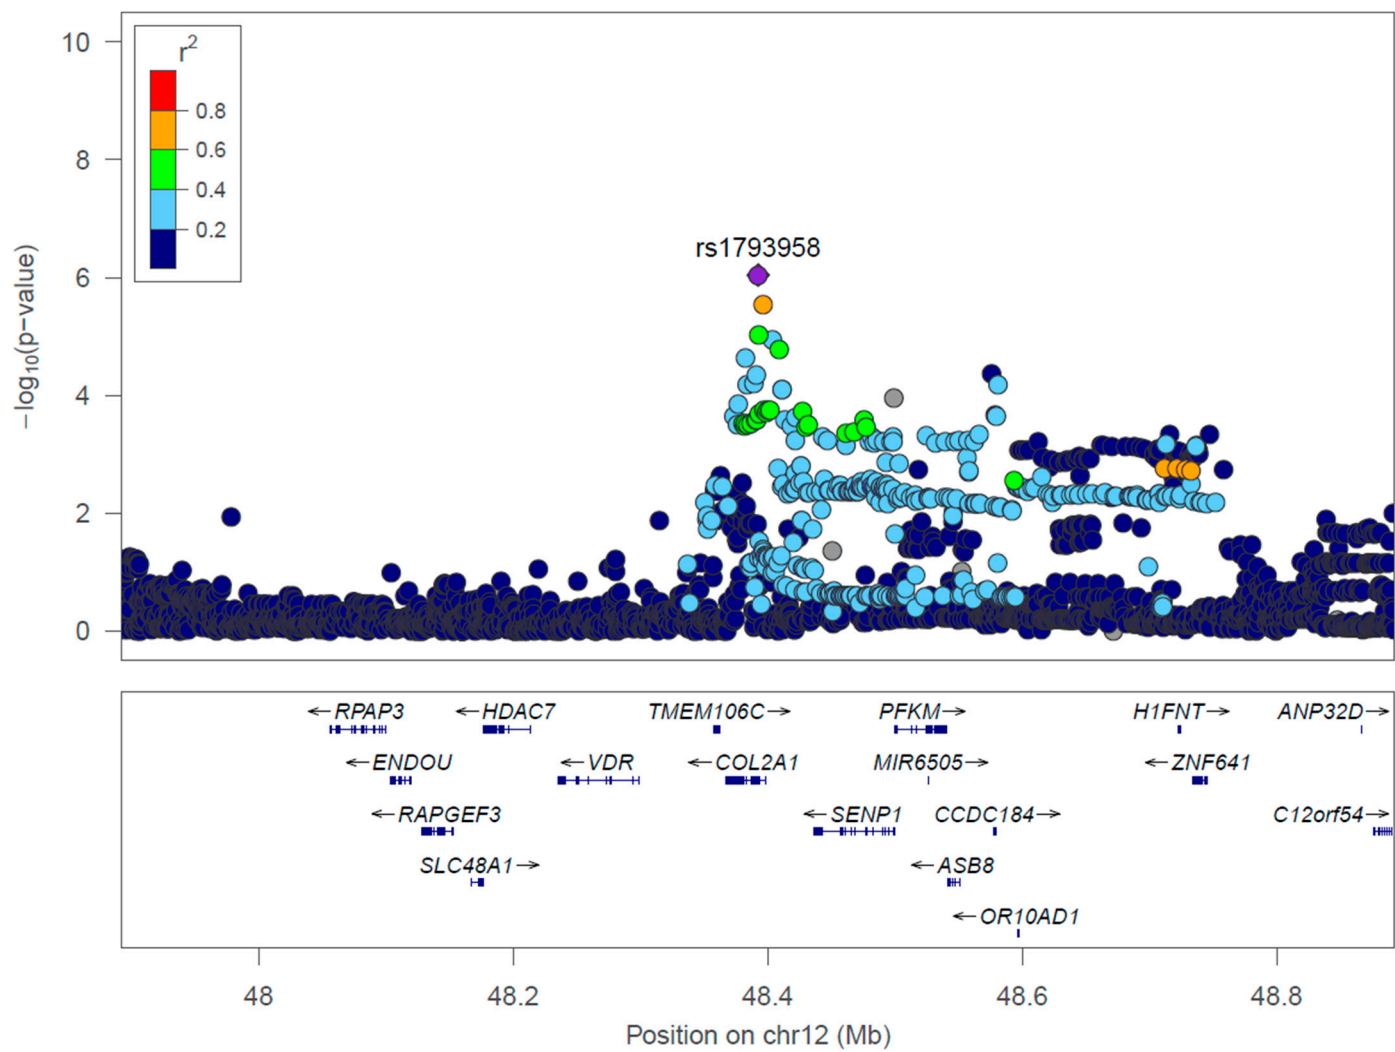

C

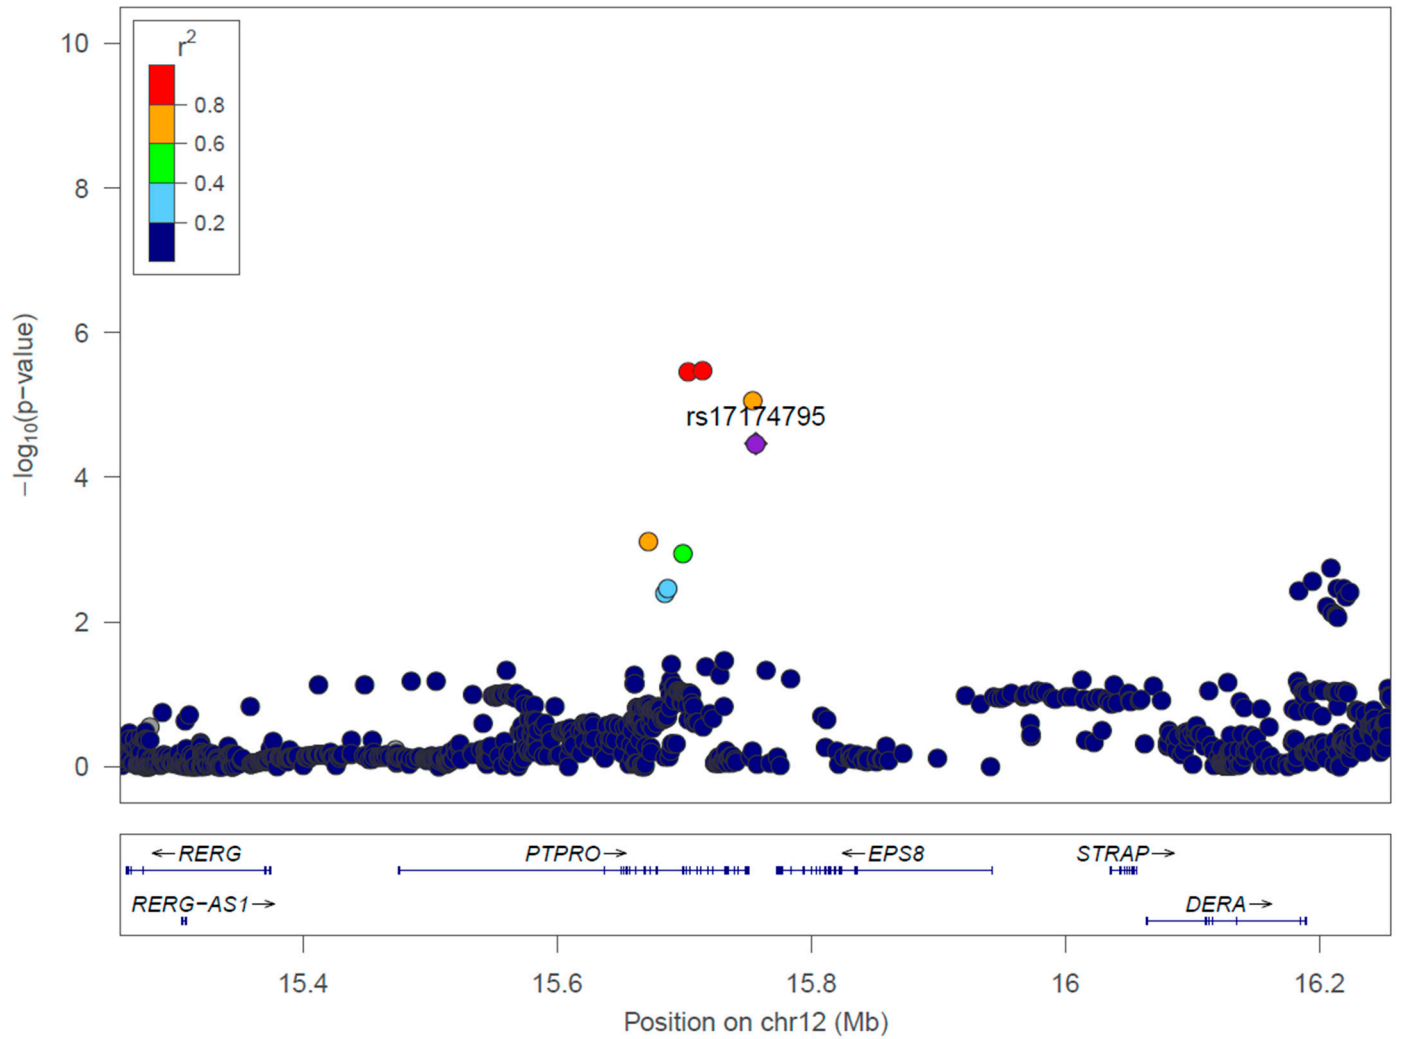

**Figure S6. Regional plot of association results using imputed genetic data for the three top-SNPs in current smokers (n=275), region around rs3851212 (A), region around rs1793958 (B) and region around rs17174795 (C).**

The left Y-axis shows the  $-\log_{10}$  P-values. The position of the SNPs in megabases (GRCh 37.p13) is shown on the X-axis.

Rs3851212, rs1793958, rs6606856 and rs17174795 are coloured in purple. The degree of LD (from the hg19/1000 Genomes reference panel) between all SNPs and the reference SNP (coloured in purple) we selected in the same region is reflected by the colour of the dots (red being the highest degree of LD).

**Table S1. Association between FLOPs level and characteristics of the studied population (n=1,216)**

|                                                | Whole sample<br>(n=1,216) | Levels of FLOPs<br>GM (Q1, Q3) | Adjusted-p            |
|------------------------------------------------|---------------------------|--------------------------------|-----------------------|
| FLOPs, RFU/mL, GM (Q1, Q3)                     | 92.3 (80, 105)            |                                |                       |
| Age, m $\pm$ sd                                | 43.3 $\pm$ 16.4           | q=0.30                         | $<1.0 \times 10^{-4}$ |
| Sex, n (%)                                     |                           |                                | $5.0 \times 10^{-3}$  |
| Men                                            | 595 (48.9)                | 91.4 (79, 103)                 |                       |
| Women                                          | 621 (51.1)                | 93.2 (81, 107)                 |                       |
| Current smoking status <sup>a</sup> , n (%)    |                           |                                | $<1.0 \times 10^{-4}$ |
| Never-smokers                                  | 604 (49.7)                | 89.1 (77, 101)                 |                       |
| Ex-smokers                                     | 337 (27.7)                | 97.2 (85, 111)                 |                       |
| Current smokers                                | 275 (22.6)                | 93.8 (82, 107)                 |                       |
| Smoking, pack-year, n (%)                      |                           |                                | $<1.0 \times 10^{-4}$ |
| Never smokers                                  | 604 (49.7)                | 89.1 (77, 101)                 |                       |
| <10                                            | 384 (31.6)                | 93.4 (81, 107)                 |                       |
| 10-20                                          | 111 (9.1)                 | 98.7 (88, 108)                 |                       |
| > 20                                           | 117 (9.6)                 | 100.3 (88, 114)                |                       |
| Neutrophils, cell/mm <sup>3</sup> , m $\pm$ sd | 3,986 $\pm$ 1,391         | q= 0.07                        | 0.10                  |
| FEV <sub>1</sub> $\geq$ 80%, n (%)             |                           |                                | 0.29                  |
| No                                             | 100 (8.3)                 | 98.1 (84, 112)                 |                       |
| Yes                                            | 1,097 (91.7)              | 91.8 (80, 105)                 |                       |

Adjusted *p*-value of association were estimated using generalized linear regression of log-FLOPs, adjusted for age (continuous), sex and smoking pack-year (pack-year), taking into account within family correlation; GM, geometric mean; Q1, 1<sup>st</sup> quartile; Q3, 3<sup>rd</sup> quartile; m, mean; sd, standard deviation; q, pearson correlation; FEV<sub>1</sub>, Forced Expiratory Volume in one second;

<sup>a</sup>, all pairwise comparisons *p*-values (scheffe's test) were < 0.05

**Table S2. Three top SNPs in the whole sample: Consistency of the results in two independent sub-samples**

| Chr | Gene        | Nearest Gene  | Genomic location | Marker     | Position bp (hg38) | A1/A2 | EAF  | Controls (n=243) |      | Cases/Relatives (n=973) |                        | Homogeneity test |      |
|-----|-------------|---------------|------------------|------------|--------------------|-------|------|------------------|------|-------------------------|------------------------|------------------|------|
|     |             |               |                  |            |                    |       |      | beta ± se        | p    | beta ± se               | p                      | khi <sup>2</sup> | p    |
| 6   | <i>BMP6</i> | <i>TXNDC5</i> | Intronic         | rs270404   | 7 757 141          | A/G   | 0.41 | -0.16 ± 0.09     | 0.08 | -0.21 ± 0.05            | 1.1 × 10 <sup>-5</sup> | 0.24             | 0.62 |
| 7   |             | <i>BMPER</i>  | 3'-UTR           | rs13223298 | 34 158 658         | G/T   | 0.08 | -0.32 ± 0.19     | 0.09 | -0.34 ± 0.08            | 5.6 × 10 <sup>-5</sup> | 0.01             | 0.92 |
| 15  |             | <i>SEMA6D</i> | Intergenic       | rs491274   | 46 577 328         | A/G   | 0.09 | -0.30 ± 0.15     | 0.05 | -0.30 ± 0.08            | 8.8 × 10 <sup>-5</sup> | 0.00             | 1.00 |

Chr, Chromosome; A1/A2, baseline/effect allele; EAF, Effect allele frequency estimated from the reference panel 1000G (European population).

Beta and standard error (se) were estimated using Gaussian linear model taking into account EGEA family structure and adjusted for principal components

**Table S3. Three top SNPs in never-smokers and in current smokers: consistency of the results in two independent sub-samples**

|                 |         |              |                  |            |                    |       |      | Controls     |                        | Cases/Relatives |                        | Homogeneity test |          |
|-----------------|---------|--------------|------------------|------------|--------------------|-------|------|--------------|------------------------|-----------------|------------------------|------------------|----------|
| Chr             | Gene    | Nearest Gene | Genomic location | Marker     | Position bp (hg38) | A1/A2 | EAF  | beta ± se    | <i>p</i>               | beta ± se       | <i>P</i>               | khi²             | <i>p</i> |
| Never-smokers   |         |              |                  |            |                    |       |      | n=114        |                        | n=490           |                        |                  |          |
| 6               | COL21A1 | DST          | Intronic         | rs17823624 | 56 348 021         | A/G   | 0.92 | 0.46 ± 0.18  | 1.1 × 10 <sup>-2</sup> | 0.44 ± 0.09     | 4.9 × 10 <sup>-6</sup> | 0.10             | 0.91     |
| 15              | GABRG3  | GABRA5       | Intronic         | rs6606856  | 27 022 887         | C/T   | 0.70 | -0.29 ± 0.13 | 2.6 × 10 <sup>-2</sup> | -0.28 ± 0.06    | 9.2 × 10 <sup>-6</sup> | 0.06             | 0.81     |
| 5               |         | NUDT12       | Intergenic       | rs2962642  | 104 131 010        | A/G   | 0.24 | 0.24 ± 0.13  | 6.6 × 10 <sup>-2</sup> | 0.31 ± 0.07     | 2.8 × 10 <sup>-6</sup> | 0.20             | 0.65     |
| Current smokers |         |              |                  |            |                    |       |      | n=59         |                        | n=216           |                        |                  |          |
| 6               | CRYBG1  | ATG5         | Intronic         | rs3851212  | 106 375 664        | A/G   | 0.94 | -0.75 ± 0.30 | 1.5 × 10 <sup>-2</sup> | -0.85 ± 0.15    | 3.7 × 10 <sup>-8</sup> | 0.07             | 0.79     |
| 12              | COL2A1  | TMEM106C     | Intronic         | rs1793958  | 47 998 650         | A/G   | 0.61 | -0.43 ± 0.18 | 1.9 × 10 <sup>-2</sup> | -0.41 ± 0.09    | 8.9 × 10 <sup>-6</sup> | 0.00             | 0.97     |
| 12              |         | PTPRO        | Intergenic       | rs17174795 | 15 603 555         | G/T   | 0.87 | -0.93 ± 0.40 | 2.5 × 10 <sup>-2</sup> | -0.58 ± 0.13    | 2.1 × 10 <sup>-5</sup> | 0.72             | 0.40     |

Chr, Chromosome; A1/A2, baseline/effect allele; EAF, Effect allele frequency estimated from the reference panel 1000G (European population).

Beta and standard error (se) were estimated using Gaussian linear model taking into account EGEA family structure and adjusted for principal components

**Table S4. Results from eQTL browser Phenoscanner v2 (<http://www.phenoscanter.medschl.cam.ac.uk/>)**

| Chr                            | Marker     | Position bp (hg38) | Ancestry | Tissue      | Gene expression | <i>p</i>              | Study   | Reference |
|--------------------------------|------------|--------------------|----------|-------------|-----------------|-----------------------|---------|-----------|
| <i>GWAS in never-smokers</i>   |            |                    |          |             |                 |                       |         |           |
| 6                              | rs17823624 | 56 348 021         | European | Whole blood | <i>DST</i>      | $2.0 \times 10^{-15}$ | eQTLGen | [3]       |
| <i>GWAS in current smokers</i> |            |                    |          |             |                 |                       |         |           |
| 12                             | rs1793958  | 47 998 650         | European | Whole blood | <i>OR10AD1</i>  | $1.3 \times 10^{-21}$ | eQTLGen | [3]       |
| 12                             | rs1793958  | 47 998 650         | European | Whole blood | <i>PFKM</i>     | $3.7 \times 10^{-41}$ | eQTLGen | [3]       |
| 12                             | rs1793958  | 47 998 650         | European | Whole blood | <i>SENPI</i>    | $2.3 \times 10^{-8}$  | eQTLGen | [3]       |
| 12                             | rs1793958  | 47 998 650         | European | Whole blood | <i>TMEM106C</i> | $1.7 \times 10^{-11}$ | eQTLGen | [3]       |
| 12                             | rs1793958  | 47 998 650         | European | Whole blood | <i>VDR</i>      | $1.1 \times 10^{-19}$ | eQTLGen | [3]       |

Chr, Chromosome.

## References

1. Kauffmann, F.; Dizier, M.H.; Annesi-Maesano, I.; Bousquet, J.; Charpin, D.; Demenais, F.; Ecochard, D.; Feingold, J.; Gormand, F.; Grimfeld, A.; et al. EGEA (Epidemiological Study on the Genetics and Environment of Asthma, Bronchial Hyperresponsiveness and Atopy)-- Descriptive Characteristics. *Clin Exp Allergy* **1999**, *29 Suppl 4*, 17–21.
2. Kauffmann, F.; Dizier, M.H. EGEA (Epidemiological Study on the Genetics and Environment of Asthma, Bronchial Hyperresponsiveness and Atopy)--Design Issues. EGEA Co-Operative Group. *Clin Exp Allergy* **1995**, *25 Suppl 2*, 19–22, doi:10.1111/j.1365-2222.1995.tb00413.x.
3. Vösa, U.; Claringbould, A.; Westra, H.-J.; Bonder, M.J.; Deelen, P.; Zeng, B.; Kirsten, H.; Saha, A.; Kreuzhuber, R.; Kasela, S.; et al. Unraveling the Polygenic Architecture of Complex Traits Using Blood EQTL Metaanalysis. *bioRxiv* **2018**, 447367, doi:10.1101/447367.
