# Supplementary material for: Genome-Wide Association Study of Fluorescent Oxidation Products Accounting for Tobacco Smoking Status in Adults from the French EGEA Study
Source: Antioxidants (Basel). 2022 Apr 20;11(5):802. doi: 10.3390/antiox11050802 (PMC9137810; doi:10.3390/antiox11050802)
Supplement: Supplementary file 1 [file antioxidants-11-00802-s001.zip › Table S5.xlsx]

## Sheet: Table S5
Table S5. meQTLs for the three top-SNPs identified in GWAS in the whole sample, in never-smokers and in current smokers
Chr	Gene	Nearest gene	Genomic location	SNP	Position bp (hg38)	CpG site	CpG site location bp (hg38)	Gene/Nearest gene	p	Study	Tissue
GWAS in the whole sample
6	BMP6	TXNDC5	Intronic	rs270404	7757141	cg06922731	chr6:7769995	BMP6	8.726 x 10-33	BIOSQTLa	Whole blood
						cg09408718	chr6:7911269	TXNDC5	1.336 x 10-8	BIOSQTLa	Whole blood
						cg08885409	chr17:55969571	CUEDC1	4.264 x 10-8	Gaunt Tb	Whole blood
7		BMPER	3'-UTR	rs13223298	34158658	cg14385738	chr1:114414340	PTPN22	9.312 x 10-8	Gaunt Tb	Whole blood
GWAS in never-smokers
6	COL21A1	DST	Intronic	rs17823624	56348021	cg12341018	chr6:56176179	COL21A1	6.738 x 10-181	BIOSQTLa	Whole blood
						cg12569497	chr6:56112720	COL21A1	2.252 x 10-32	BIOSQTLa	Whole blood
						cg25465438	chr6:56194482	COL21A1	2.078 x 10-15	BIOSQTLa	Whole blood
						cg12569497	chr6:56112696	COL21A1	2.143 x 10-11	Gaunt Tb	Whole blood
						cg00684824	chr6:56112000	COL21A1	1.132 x 10-8	BIOSQTLa	Whole blood
						cg22315922	chr6:56622531	DST	5.368 x 10-8	Gaunt Tb	Whole blood
						cg20368283	chr6:56112616	COL21A1	6.226 x 10-8	BIOSQTLa	Whole blood
						cg05126887	chr6:56112524	COL21A1	2.359 x 10-7	BIOSQTLa	Whole blood
5		NUDT12	Intergenic	rs2962642	104131010	cg24899558	chr5:103329046	NUDT12	3.242 x 10-12	BIOSQTLa	Whole blood
GWAS in current smokers
6	CRYBG1	ATG5	Intronic	rs3851212	106375664	cg12018888	chr6:106583194	ATG5	5.121 x 10-9	BIOSQTLa	Whole blood
						cg16567330	chr6:106577582	ATG5	2.168 x 10-8	BIOSQTLa	Whole blood
12	COL2A1	TMEM106C	Intronic	rs1793958	47998650	cg19601035	chr12:48399116	C12orf54	5.899 x 10-62	BIOSQTLa	Whole blood
						cg24011408	chr12:48396354	C12orf54	1.914 x 10-57	Gaunt Tb	Whole blood
						cg14793287	chr12:48578597	LALBA	1.191 x 10-42	BIOSQTLa	Whole blood
						cg00796672	chr12:48596841	LALBA	2.286 x 10-34	BIOSQTLa	Whole blood
						cg23069305	chr12:48500342	C12orf54	9.327 x 10-34	BIOSQTLa	Whole blood
						cg26333618	chr12:48336679	ZNF641	8.357 x 10-33	BIOSQTLa	Whole blood
						cg06585804	chr12:48402030	C12orf54	1.062 x 10-29	BIOSQTLa	Whole blood
						cg20731937	chr12:48336164	ZNF641	4.188 x 10-20	Gaunt Tb	Whole blood
						cg10502244	chr12:48399271	C12orf54	1.652 x 10-17	BIOSQTLa	Whole blood
						cg18990042	chr12:48399145	C12orf54	2.773 x 10-16	BIOSQTLa	Whole blood
						cg00985115	chr12:48592842	LALBA	1.323 x 10-13	BIOSQTLa	Whole blood
						cg17527422	chr12:48579269	LALBA	1.964 x 10-12	BIOSQTLa	Whole blood
						cg01906695	chr12:48399517	C12orf54	3.303 x 10-12	BIOSQTLa	Whole blood
						cg15175632	chr12:48597263	LALBA	1.68 x 10-11	BIOSQTLa	Whole blood
						cg27446233	chr12:48516484	OR8S1	2.799 x 10-11	Gaunt Tb	Whole blood
						cg19066141	chr12:48395844	C12orf54	3.3 x 10-10	BIOSQTLa	Whole blood
						cg26205652	chr12:48591970	LALBA	1.214 x 10-9	BIOSQTLa	Whole blood
						cg07347128	chr12:48336360	ZNF641	1.253 x 10-9	Gaunt Tb	Whole blood
						cg03495195	chr12:48396838	C12orf54	2.665 x 10-9	BIOSQTLa	Whole blood
						cg15465823	chr12:48382558	C12orf54	9.867 x 10-9	BIOSQTLa	Whole blood
						cg08886711	chr12:48399156	C12orf54	3.148 x 10-8	BIOSQTLa	Whole blood
						cg16737714	chr11:809907	RPLP2	3.336 x 10-8	Gaunt Tb	Whole blood
						cg02761866	chr12:48542750	OR5BS1P	5.227 x 10-8	BIOSQTLa	Whole blood
						cg23150604	chr2:85732147	GNLY	6.62 x 10-8	Gaunt Tb	Whole blood
						cg11409205	chr12:48357748	ZNF641	7.557 x 10-8	BIOSQTLa	Whole blood
						cg04545296	chr12:48745243	ADCY6	8.775 x 10-8	Gaunt Tb	Whole blood
Chr, Chromosome; a,Zhernakova DV, Deelen P, Vermaat M, van Iterson M, van Galen M, Arindrarto W, et al. 2017. Identification of context-dependent expression quantitative trait loci in whole blood. Nat Genet 49:139–145; doi:10.1038/ng.3737; b, Gaunt TR, Shihab HA, Hemani G, Min JL, Woodward G, Lyttleton O, et al. 2016. Systematic identification of genetic influences on methylation across the human…
