# Supplementary material for: Genome-Wide Association Study of Fluorescent Oxidation Products Accounting for Tobacco Smoking Status in Adults from the French EGEA Study
Source: Antioxidants (Basel). 2022 Apr 20;11(5):802. doi: 10.3390/antiox11050802 (PMC9137810; doi:10.3390/antiox11050802)
Supplement: Supplementary file 1 [file antioxidants-11-00802-s001.zip › Table S6.xlsx]

## Sheet: Table S6
Table S6. Regulatory elements for the three top-SNPs (and proxies with r²>0.80) identified in GWAS in the whole sample, in never-smokers and in current smokers
Chr	Gene	Nearest Gene	Genomic Location	SNP	pos bp (hg38)	r²	D'	CADD-Score#,‡	Enhancer/Promoter histone marks	DNAse	Proteins bound	Regulatory Motifs altered
GWAS in the whole sample
6	BMP6	SNRNP48	intronic	rs270411	7740427	0.80	-0.90	4.475	ESC, ESDR, FAT, LNG, OVRY, VAS, SKIN			Nkx2, Nkx6-1, Pou3f2, Pou3f3, TEF
6	BMP6	TXNDC5	intronic	rs1226100	7755812	1.00	1.00	6.876	VAS			Ncx, Pax-4
6	BMP6	TXNDC5	intronic	rs270404a	7757141	-	-	8.202	BONE, BRN, ESDR, GI, LIV, VAS			BDP1, Roaz, SP1
6	BMP6	TXNDC5	intronic	rs270401	7760003	1.00	1.00	4.056	FAT, GI, OVRY			AP-1, Lmo2-complex, PLZF, SP1, ZEB1
6	BMP6	TXNDC5	intronic	rs270379	7762003	0.98	0.99	0.191	BRN, MUS, VAS			ERalpha-a, GATA, Zbtb3
6	BMP6	TXNDC5	intronic	rs270377	7762785	0.98	0.99	0.982	BRN, KID, MUS, VAS			GATA
6	BMP6	TXNDC5	intronic	rs1226103	7764560	0.98	0.99	0.082	BRN, GI, LNG, MUS, OVRY, SPLN, VAS			Foxa, Foxj2, GR, TAL1, p300
6	BMP6	TXNDC5	intronic	rs270390	7771737	0.83	0.97	0.074	CRVX, ESC, ESDR, IPSC, STRM, VAS
7		BMPER	3'-UTR	rs13222360	34158063	0.94	1.00	4.777	BONE, BRN, CRVX, ESDR, FAT, GI, HRT, IPSC, LNG, MUS, PANC, PLCNT, SKIN, STRM, THYM, VAS	MUS		Smad3
7		BMPER	3'-UTR	rs34663534	34158338	0.88	0.98	0.012	BONE, BRN, BRST, CRVX, ESC, ESDR, FAT, GI, HRT, IPSC, KID, LIV, LNG, MUS, PANC, PLCNT, STRM, SKIN, THYM, VAS	HRT, LNG, MUS	FOXA1, ERALPHA_A, GATA3, P300	GR
7		BMPER	3'-UTR	rs13223298a	34158658	-	-	4.851	BONE, BRN, BRST, ESC, ESDR, FAT, GI, HRT, IPSC, KID, LIV, LNG, MUS, PANC, PLCNT, STRM, SKIN, THYM, VAS	ESDR, GI, HRT, LNG, MUS, PANC, SKIN		BATF, Irf, NF-I, PU.1
15		SEMA6D	intergenic	rs701459	46570556	0.92	0.98	1.382	PLCNT, VAS			E2F, Mxi1, Myc, RFX5
15		SEMA6D	intergenic	rs523915	46572486	0.95	0.98	2.868	ESC, ESDR, IPSC, VAS			GATA, HNF1, Irf, NF-Y
15		SEMA6D	intergenic	rs537378	46573665	0.95	0.98	0.009	ESC, IPSC, LIV, PANC, PLCNT, VAS			RFX5
15		SEMA6D	intergenic (indel)	rs34549209	46575216	0.97	0.98	0.423	ESDR, GI, LIV, PLCNT, SKIN, VAS			CIZ, Cdx, Cdx2, Evi-1, HDAC2, HMG-IY, Myc, TCF12
15		SEMA6D	intergenic	rs491274a	46577328	-	-	3.689	ESDR, CRVX, LIV, GI, HRT, KID, LNG, PLCNT, SKIN, STRM
15		SEMA6D	intergenic	rs510950	46579241	0.92	0.97	0.070	GI, LIV, PLCNT
15		SEMA6D	intergenic	rs491311	46582710	0.93	1.00	0.559
GWAS in never-smokers
6	COL21A1	DST	intronic	rs17823624a	56348021	-	-	2.668	BONE, BRN, BRST, CRVX, ESC, ESDR, FAT, LNG, MUS, PANC, SPLN, SKIN, STRM
15	GABRG3	GABRA5	intronic	rs6606856a	27022887	-	-	5.626	GI			BRCA1, DMRT5, Foxp3, NF-I
5		NUDT12	intergenic	rs6890378	104071097	0.81	0.94	0.775	ESC			HNF4, Maf, Myf, NRSF, TCF4
5		NUDT12	intergenic	rs62361879	104082137	0.81	0.94	0.900	BLD, ESC, GI			FXR, Hbp1
5		NUDT12	intergenic	rs1296166	104083935	0.81	0.94	0.201	ESC, IPSC
5		NUDT12	intergenic	rs62361881	104089501	0.83	0.95	4.360	BLD, ESC, ESDR, MUS, PANC	BLD, CRVX, BRN, LNG	IRF4, OCT2, POU2F2, POL24H8, CEBPB, FOSL1, JUNB, JUND	Evi-1, Foxp1
5		NUDT12	intergenic	rs62361882	104089675	0.83	0.95	2.152	BLD, ESC, ESDR, MUS, PANC	BLD, BRN, LNG	IRF4, CEBPB, FOSL1, JUNB, JUND	BRCA1, HDAC2, HNF4, Roaz
5		NUDT12	intergenic	rs113316132	104092156	0.81	0.93	0.691	PANC			ERalpha-a, LXR, NR4A, RAR, RXRA
5		NUDT12	intergenic	rs72773285	104095241	0.81	0.93	3.576	OVRY			LRH1
5		NUDT12	intergenic	rs954156	104101921	0.87	0.97	0.476	ESDR			Foxp1, Mef2, Pou2f2, TEF, YY1, Zfp105
5		NUDT12	intergenic	rs72773286	104102560	0.85	0.96	2.140
5		NUDT12	intergenic	rs1819900	104104545	0.88	0.98	0.836
5		NUDT12	3'-UTR	rs12188706	104105799	0.88	0.98	1.728	FAT			Pax-8
5		NUDT12	3'-UTR	rs72773290	104107314	0.90	0.98	3.038				Mef2
5		NUDT12	3'-UTR	rs11953057	104107540	0.90	0.99	1.856				Ncx, STAT, Sox
5		NUDT12	3'-UTR	rs7712621	104108289	0.90	0.99	2.351				Fox, Foxd3, Foxf1, Foxf2, Foxj1, Foxk1, Foxl1, Foxo, Foxp1, Foxq1, HMG-IY, Hoxb13, PLZF, Pou3f2, Pou4f3, Sox, TATA, Zfp105
5		NUDT12	3'-UTR	rs11957971	104108429	0.90	0.98	2.199				CIZ, FAC1, Foxp1
5		NUDT12	intergenic	rs7725285	104111482	0.90	0.99	6.509	BLD, BRN, FAT, ESDR, STRM
5		NUDT12	intergenic	rs7716894	104114689	0.91	0.99	0.218	ESC			GATA
5		NUDT12	intergenic	rs72775009	104126729	0.97	0.99	2.829	ESDR			DMRT3, DMRT5, DMRT7, Foxp1, Maf, Myc, Pou2f2, Pou5f1
5		NUDT12	intergenic	rs62361939	104130022	0.97	0.99	3.060	GI
5		NUDT12	intergenic	rs2962642a	104131010	-	-	1.530	ESC			Foxd1
5		NUDT12	intergenic	rs2952553	104131833	1.00	1.00	5.556	HRT			DMRT3, Dobox4, Pou3f2, Rhox11
5		NUDT12	intergenic	rs2952554	104132963	1.00	1.00	3.694	BLD, HRT			CTCF, LBP-9
5		NUDT12	intergenic	rs2952555	104133774	1.00	1.00	0.546	ESC, HRT			Irf
5		NUDT12	intergenic	rs2962647	104135606	0.87	1.00	4.389	FAT, HRT			Barhl1, Dlx2, Isl2
5		NUDT12	intergenic (indel)	rs200934628	104135791	0.85	0.98	7.396	HRT, IPSC			Barx1, Dbx1, Dbx2, GATA, HLF, Hmx, Hoxb4, Hoxb8, Hoxc10, Hoxc9, Hoxd8, Isl2, Lhx3, Msx-1, Ncx, Nkx6-1, Pdx1, Pou3f2, Pou3f4, Pou4f3, Sox
5		NUDT12	intergenic	rs2962648	104135793	0.85	1.00	5.567	HRT, IPSC			Dbx1, GATA, Hoxb8, Hoxd8, Ncx, Pdx1, Pou3f4, Pou4f3
5		NUDT12	intergenic	rs2952548	104135795	0.85	1.00	1.482	HRT, IPSC			Dbx1, GATA, Hoxd8, Isl2, Ncx, Nkx6-1, Pou3f4, Pou4f3, SIX5
5		NUDT12	intergenic	rs2141882	104136939	0.87	1.00	0.044	ESDR, HRT, IPSC			Foxj1, Foxk1, Foxo, Homez, Sox
5		NUDT12	intergenic	rs1882561	104137672	0.87	1.00	2.330	BRN, ESDR, HRT, IPSC,			MAZ, PU.1, RXRA, SZF1-1
5		NUDT12	intergenic (indel)	rs145891158	104138663	0.87	1.00	4.176	ESDR			CEBPB, CEBPG, DMRT3, Dbx1, Foxj1, GATA, Hoxa10, Ncx, PLZF, Pou2f2, Pou3f2, STAT, Sox, p300
5		NUDT12	intergenic	rs2952549	104139323	0.87	1.00	0.551
5		NUDT12	intergenic	rs17400091	104143330	0.87	1.00	5.627				AP-1, Foxa, Foxd3, Foxf1, Foxi1, Foxj2, Foxl1, Foxo, Foxq1, HDAC2, Pou2f2, Sox, Zfp105, p300
5		NUDT12	intergenic	rs7735596	104154308	0.85	0.98	0.800
5		NUDT12	intergenic (indel)	rs113498341	104155482	0.87	1.00	8.921				Foxp1, GATA, HDAC2, Irf, Nanog, Pou5f1, Sox, p300
5		NUDT12	intergenic	rs6896979	104163961	0.87	1.00	1.768				EWSR1-FLI1, Foxp1, SETDB1
5		NUDT12	intergenic	rs78835647	104166510	0.87	1.00	4.367				Msx-1
5		NUDT12	intergenic (indel)	rs200133005	104166592	0.84	0.99	0.597				AP-3, Barhl1, Cdx2, Dbx1, Foxl1, Homez, Hoxa10, Hoxb8, Hoxc6, Hoxc9, Hoxd8, Mef2, Ncx, Nkx6-2, PLZF, Pax7, Pou2f2, Prrx2, RXRA, SIX5, TATA
5		NUDT12	intergenic (indel)	rs36048999	104166594	0.83	0.95	5.655				Cdx2, Dbx1, Evi-1, Foxl1, Foxp1, Hoxa10, Hoxa5, Hoxb8, Hoxc6, Mef2, Nkx6-2, PLZF, Pax7, Pou1f1, Pou3f2, Pou3f3, Prrx2, RXRA, SIX5, TATA
5		NUDT12	intergenic	rs111817460	104168641	0.8	0.96	1.369				BHLHE40, CHD2, CIZ, Egr-1, Ets, Glis2, Pou2f2, RREB-1, SP1, STAT, Sp4, WT1, YY1, ZBTB7A, ZNF219, Zfp281, Zfp740
5		NUDT12	intergenic	rs72775066	104168937	0.84	0.98	8.970				AIRE, BCL, YY1
5		NUDT12	intergenic	rs10515360	104171830	0.85	0.99	11.94	BRN, CRVX, FAT, GI			BCL, Maf, Pou3f2
5		NUDT12	intergenic	rs36006312	104171854	0.85	0.99	12.14	BRN, CRVX, FAT, GI			EBF, NF-kappaB
5		NUDT12	intergenic	rs10066603	104175467	0.85	0.99	0.893	ESC			Osf2
5		NUDT12	intergenic	rs7731254	104180372	0.85	0.99	4.695	BLD, BRN, CRVX, ESC, ESDR, GI, IPSC, LNG			EBF, FXR, Nrf1, PLAG1, TATA
5		NUDT12	intergenic	rs2141883	104182634	0.85	0.99	2.967				Dobox4, GR, Zbtb3
5		NUDT12	intergenic	rs1922503	104185285	0.85	0.99	2.337	MUS, PLCNT			Nr2f2, Pou6f1
5		NUDT12	intergenic	rs145025632	104191600	0.85	0.98	1.292
5		NUDT12	intergenic	rs1664597	104202077	0.84	0.98	1.956				BCL, GATA, Pax-5
GWAS in current smokers
6		CRYBG1	5'-UTR	rs80157869	106357348	0.85	0.97	6.220	BRST, GI, SKIN, VAS
6		CRYBG1	5'-UTR	rs75009720	106359208	0.85	0.97	6.519	BLD, GI, IPSC, MUS, SKIN			GR, Klf7, MZF1::1-4, SIX5, SP1, Znf143
6	CRYBG1	ATG5	intronic	rs3851212a	106375664	-	-	3.161	BRST, SKIN, STRM			CDP, Foxa, STAT
6	CRYBG1	ATG5	intronic	rs79231630	106376193	0.80	0.90	14.52	BONE, BRST, GI, SKIN, STRM			AP-1, p300
12	COL2A1	TMEM106C	intronic	rs1793958a	47998650	-	-	9.905	BLD, BRN, BRST, ESC, ESDR, , GI, IPSC, LNG, MUS, SKIN, STRM	IPSC		AP-1, ERalpha-a, Esr2, NRSF, Nanog, Pax-4, Pou2f2, RXRA, Sox, TCF4
12		COL2A1	intronic (indel)	rs68168422	48010054	0.83	0.93	8.730	ESDR, IPSC	BLD		Gfi1, LXR, Pax-2
12	PTPRO	EPS8	intronic	rs7139325	15550199	0.84	0.92	0.759	BLD, ESC, GI			Fox
12	PTPRO	EPS8	intronic	rs73066694	15561813	0.86	0.94	1.312	BLD, BRN, FAT, GI, LNG, MUS, OVRY, SKIN, THYM			BCL, Evi-1, PU.1, Pax-5, Pou1f1, Pou2f2, Pou3f3, Pou5f1, RXRA, p300
12		PTPRO	intergenic	rs17174795a	15603555	-	-	0.879	ADRL, BONE, BRN, ESDR, FAT, GI, HRT, LIV, LNG, MUS, OVRY, PLCNT, SKIN	BLD, BRN, ESDR, HRT, LNG, MUS, PLCNT	MAFK	Hoxa13, Hoxc10
Chr, Chromosome; #, scaled CADD scores were obtained using CADD v1.4 (https://cadd.gs.washington.edu/); ‡, Kircher .M, et al. A General Framework for Estimating the Relative Pathogenicity of Human Genetic Variants. Nat Genet 2014, 46, 310–315, doi:10.1038/ng.2892.; a, Lead SNP identified in the GWAS; ADRL, fetal adrenal gland; BLD, blood cells; BONE, osteoblast Primary Cells; BRN, brain tissues; …
